# Supplementary material for: Anchoring genome sequence to chromosomes of the central bearded dragon (Pogona vitticeps) enables reconstruction of ancestral squamate macrochromosomes and identifies sequence content of the Z chromosome
Source: PubMed Central journal article supplement (PMC4902969; doi:10.1186/s12864-016-2774-3), 2016-06-10

163B17 (WNT4)

3L7 (sex chromosomes)

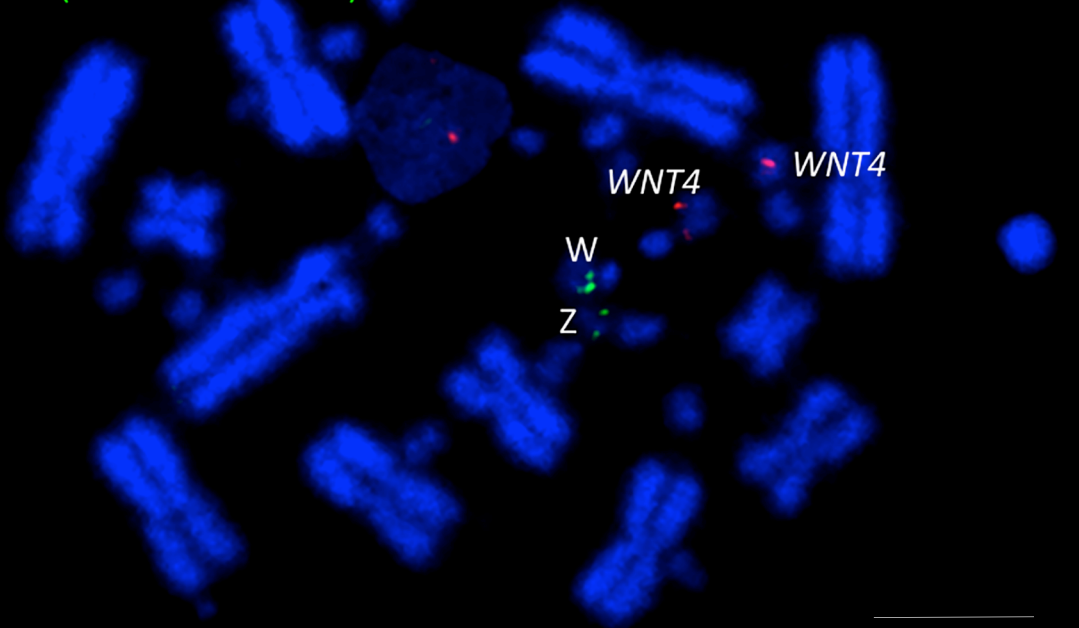

Supplement: 12864_2016_2774_MOESM3_ESM.pdf [file 12864_2016_2774_MOESM3_ESM.pdf]
